# Supplementary material for: Putting the brakes on mammary tumorigenesis: Loss of STAT1 predisposes to intraepithelial neoplasias
Source: Oncotarget. 2011 Dec 19;2(12):1043–54. doi: 10.18632/oncotarget.371 (PMC3282066; doi:10.18632/oncotarget.371)
Supplement: Supplementary file 4 [file oncotarget-02-1043-s004.pdf]

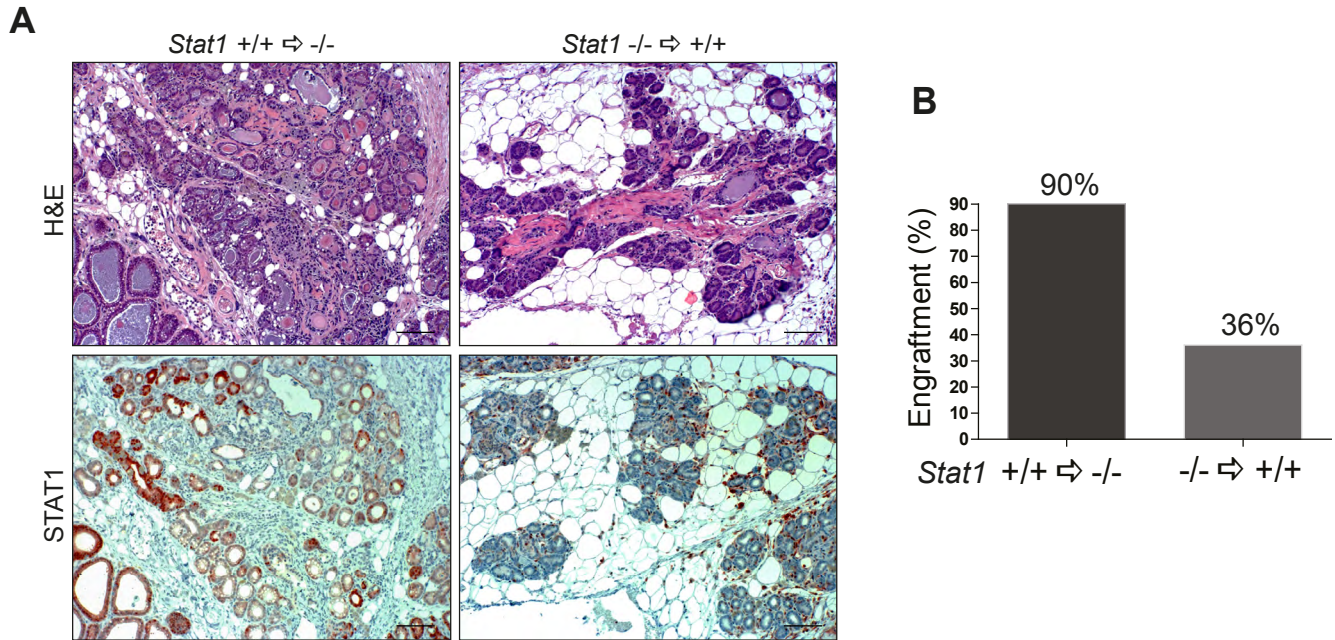

**Fig. S1. Verification of successful engraftment of transplanted mammary gland tissue.** (A) Histological sections of transplanted mammary glands were stained for H&E and STAT1 to verify successful engraftment of transplants. Left panel: *Stat1*<sup>+/+</sup> mammary gland tissue was transplanted into a *Stat1*<sup>-/-</sup> mouse; right panel: *Stat1*<sup>-/-</sup> mammary gland tissue was transplanted into a *Stat1*<sup>+/+</sup> mouse. Scale bars: 100  $\mu$ m. (B) Rate of successful engraftment of transplanted mammary gland tissue in *Stat1*<sup>+/+</sup> and *Stat1*<sup>-/-</sup> animals. Transplant groups: *Stat1*<sup>+/+</sup> tissue in *Stat1*<sup>-/-</sup> mice, *Stat1*<sup>-/-</sup> tissue in *Stat1*<sup>+/+</sup> mice.

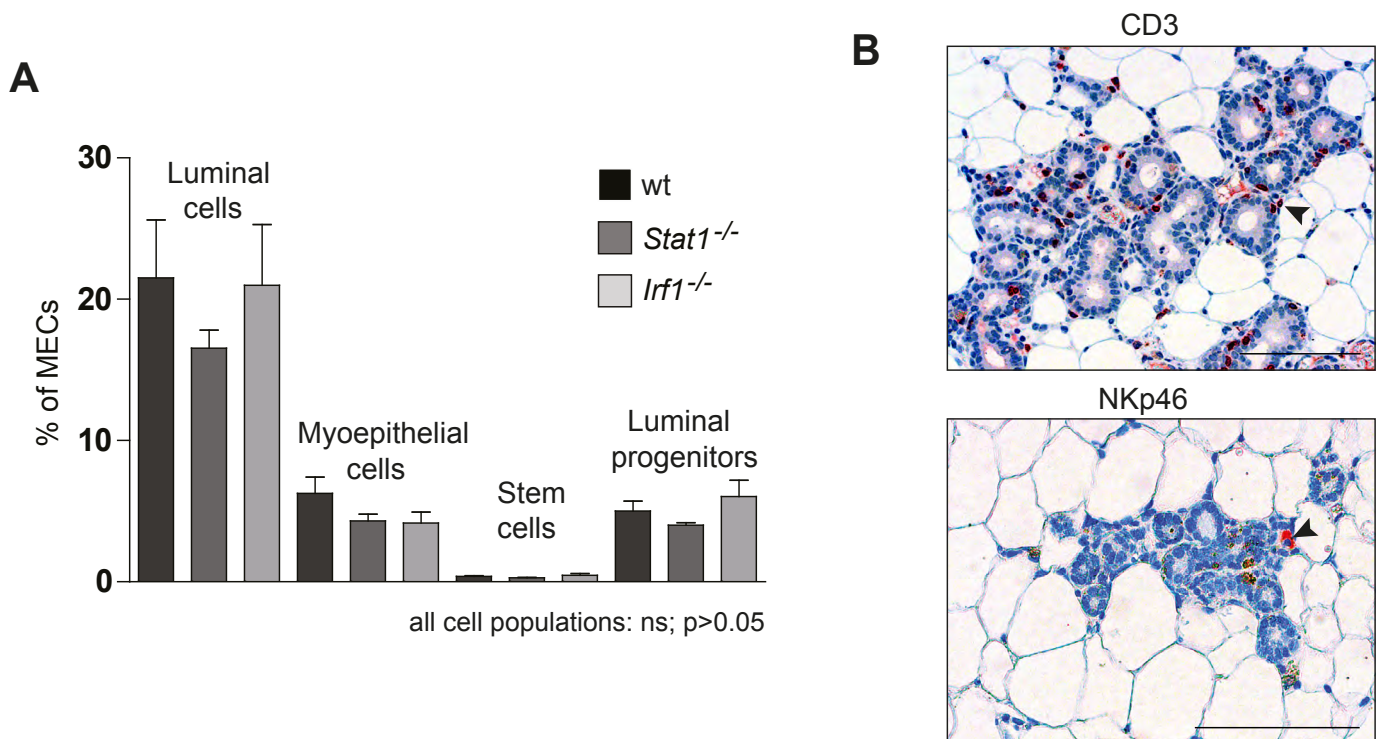

**Fig. S2. Successful engraftment of transplanted mammary gland tissue is influenced by CTLs and NK-cells but not by differences in mammary stem cell populations.** (A) Flow cytometric analysis of mammary cells from wt, *Stat1*<sup>-/-</sup> and *Irf1*<sup>-/-</sup> mice. Luminal cells: CD24<sup>hi</sup>CD49<sup>lo</sup>, myoepithelial cells: CD24<sup>lo</sup>CD49<sup>hi</sup>, stem cells: CD24<sup>mid</sup>CD49<sup>hi</sup>, Luminal progenitors: CD24<sup>hi</sup>CD49<sup>lo</sup>CD61<sup>+</sup>. (B) CD3- and NKp46-stained histological sections of transplanted mammary glands show infiltration with CTLs and NK-cells. Scale bars: 100  $\mu$ m.

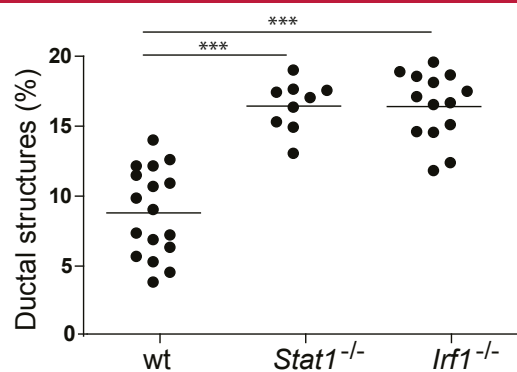

**Fig. S3. Quantitative analysis of ductal density from mammary gland whole mounts.** Pictures of 2.5x magnification were taken and analyzed using ImageJ 1.37a software.  $n \geq 9$ .

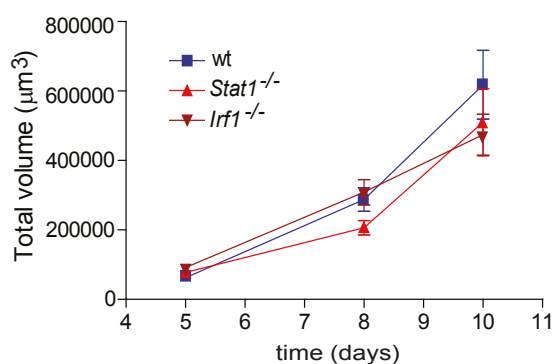

all time points: ns;  $p > 0.05$

**Fig. S4. Total volume of 3D-cultured spheres** derived from wt, *Stat1*<sup>-/-</sup> and *Irf1*<sup>-/-</sup> mammary epithelial cells at different time points of growth. Total volume ( $V_T$ ) was calculated by means of the formula  $V_T = 4/3 * r_T^3$ .

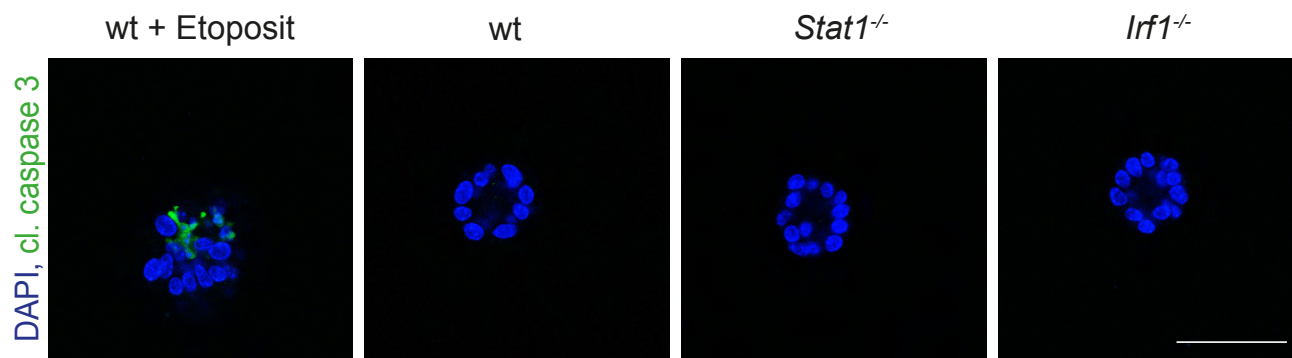

**Fig. S5. Mammospheres for lumen without involvement of apoptotic mechanisms.** Fluorescence microscopy pictures from 2 day-old spheres of different genotypes. To ensure a positive cleaved caspase 3 staining, wildtype mammospheres were treated with 50  $\mu$ M Etoposin for 24h. (Blue) DAPI; (green) Cleaved caspase 3. Scale bar: 50  $\mu$ m.

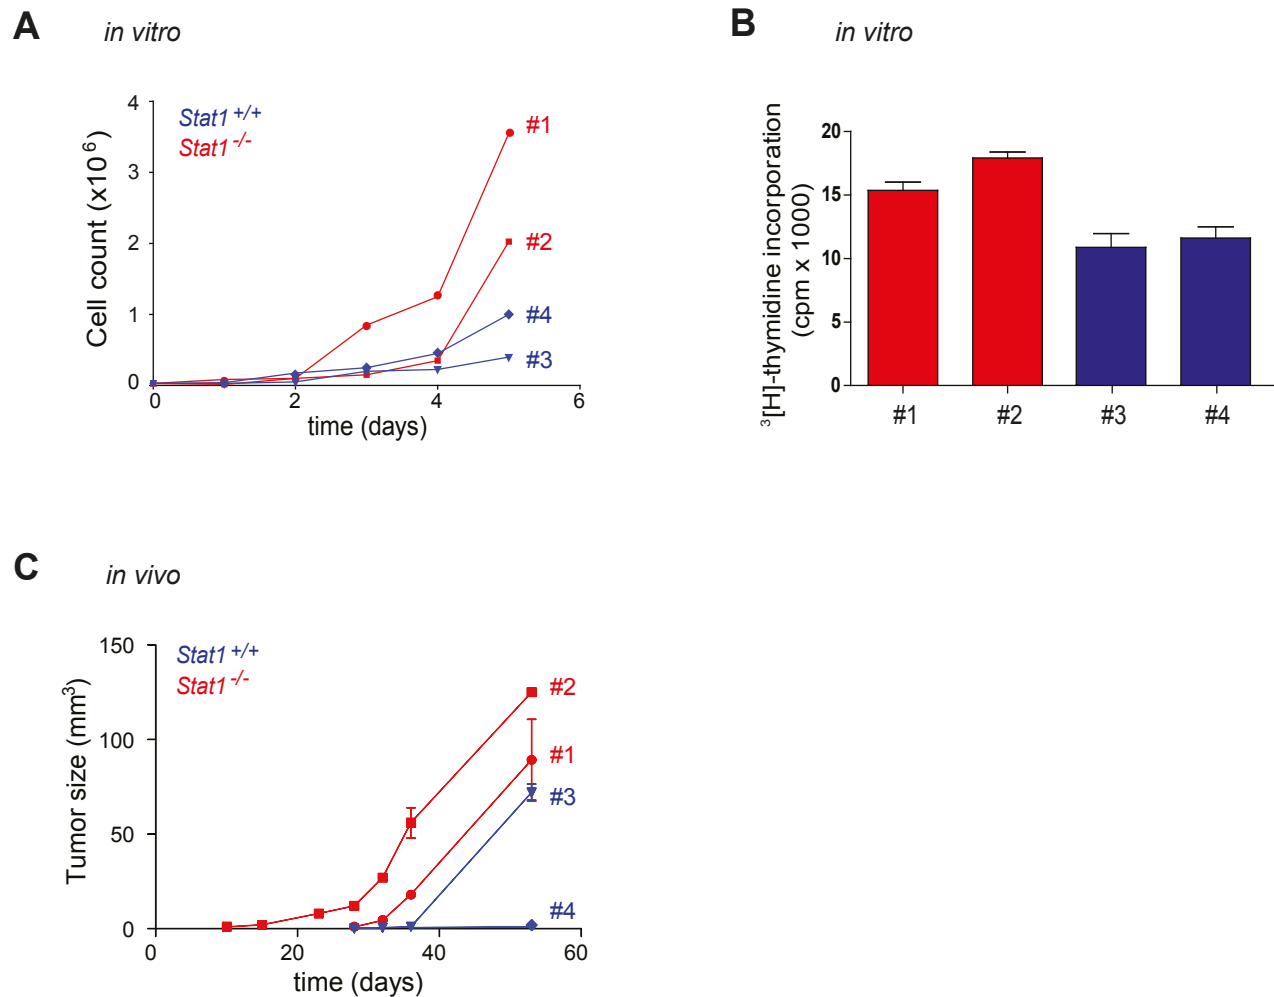

**Fig. S6. *Stat1*<sup>-/-</sup> mammary tumor cell lines show increased proliferation *in vitro* and *in vivo*.** (A) Growth curve of mammary tumor cell lines #1-#4. (B) [<sup>3</sup>H]-thymidine incorporation of mammary tumor cell lines #1-#4. (C) *In vivo* proliferation of mammary tumor cell lines #1-#4. 2x10<sup>5</sup> cells of each cell line were orthotopically injected into *Stat1*<sup>-/-</sup> mice. Tumor growth was measured at different time points with tumor size calculated by means of the formula  $V = \frac{3}{4} \pi * L * W * H$ .  $n \geq 4$  per cell line.
